# Supplementary material for: Polymerization-Induced Nano-Order, Ordered Melt, Chain Explosion and Meso-Superstructures of E-Polyethylene
Source: Research Square preprint supplement (doi:10.21203/rs.3.rs-5814738/v1), 2025-01-15
Supplement: Supplementary file 1 [file 8f0de88bc5dfb5d54ce00948.docx]

Supplementary Materials for

**Polymerization-Induced Nano-Order, Ordered Melt, Chain Explosion and Meso-Superstructures of E-Polyethylene**

Aizezi Maimaitiming1*, Kun Cui1 & Feng Tian2

1State Key Laboratory of Organometallic Chemistry, Shanghai Institute of Organic Chemistry, Chinese Academy of Sciences, Shanghai 200032, P. R. China

2Shanghai Synchrotron Radiation Facility, Shanghai Advanced Research Institute, Chinese Academy of Sciences, Shanghai 201204, China

*Corresponding author: Dr. Aizezi Maimaitiming (azizm@sioc.ac.cn).

**Table S1** Tensile and thermal properties of compressed sheets *a*

| Sample | *ε*b  (MPa) | *σ*b (MPa) | *ε*y  (MPa) | *T*m  [°C] | *T*c  [°C] | *X*c  [%] | *No*. |
| --- | --- | --- | --- | --- | --- | --- | --- |
| **ISO527.2–5B/50** | | | | | | | |
| G1-300-IC | 76.6±3.1 | 566±15 | 38.5±1.3 | 140.6 | 116.1 | 69.4 | 6 |
| G2-300-IC | 75.6±2.4 | 672±26 | 34.9±1.5 | 136.7 | 117.9 | 60 | 6 |
| G4-300-IC | 61 | 758 |  | 139.6 | 116.7 | 65.1 | 2 |
| G5-300-IC | 57 | 591 |  | 138.9 | 117.3 | 62.5 | 2 |
| **ISO20573-TypeCP/50** | | | | | | | |
| G1-300-Q | 42.4±1.8 | 602±29 | 24.2±0.9 | 137.4 | 116.8 | 62.1 | 5 |
| G2-300-Q | 49.5±2.5 | 840±43 | 25.6±0.6 | 132.5 | 118.3 | 51.9 | 5 |
| G1-142-IC | 48.8±2.1 | 558±39 | 34.3±0.5 | 139.3 | 117.5 | 69.3 | 3 |
| G2-142-IC | 63.1±3.2 | 789±44 | 30.1±0.6 | 135.4 | 118.8 | 57.3 | 3 |
| **ISO20573-TypeCP/50** | | | | | | | |
| G2-140-3# | 95.9 | 70 | - | 136.1*b*  137.9  135.5*c*  132.3 | 119.8 | 47.1  61.3  54.7 | 1 |
| G1-142-3# | 63.1 | 131 | - | 140.0  138.5  138.7  135.3 | 115.6 | 55.2  65.8  57.3 | 1 |
| G2-140-2# | 88.4 | 44.8 | - |  |  |  | 2 |
| G1-142-2# | 61.7 | 97 | - |  |  |  | 2 |
| G4-142-IC | 29.1±1.5 | 153±23 | - | 143.6  137.3 | 119.8 | 67.3 | 3 |
| **ISO20573-TypeCP/50** | | | | | | | |
| G4-145-2D | 42.5±1.3 | 745±20 | 23.4±0.5 | 138.0 | 119.2 | 65 | 3 |
| G4-150-2D | 47.5±0.7 | 968±7 | - |  |  |  | 3 |
| G4-150-3D | 41.5±0.04 | 999±4 | - | 133.1 | 118.7 | 48.3 |  |
| G4-190-3D | 53.1±2.1 | 1076±36 | - | 133.6 | 118.6 | 53.1 | 3 |

*a* *ε*b: tensile strength at break; *σ*b: tensile strain at break; *ε*y: tensile strength at yielding; *T*m: peak melting temperature; *T*c: peak crystallization temperature; *N*o.: number of samples tested; *b* first and second heating DSC curves of longitudinal and directions.

**Methods**:

*Preparation of Dumbbell-shaped Samples via Surface Shearing*: 45 g of nascent powders of G1–2 and G4 in five parallel molds with a shape and size of ISO20573-TypeCP were pre-compressed at 0.3 MPa and 128 °C for 400 s, pre-compressed at 2.5 MPa and 128 °C for 200 s, and compressed at 10 MPa and 128 °C for 900 s. Then, the temperature was increased to 142–145 °C for 400s under a pressure of 0.3 MPa, and the preformed samples were compressed at 2.5 MPa and 142–145 °C for 200 s and compressed at 10 MPa and 142 °C for 120–600 s. For isothermal crystallization (IC), the temperature was decreased to 128 °C for 30 min under a pressure of 10 MPa, and the samples were isothermally crystallized for 1 h under a pressure of 10 MPa and then quenched to room temperature (Extended Data Fig. 10b).


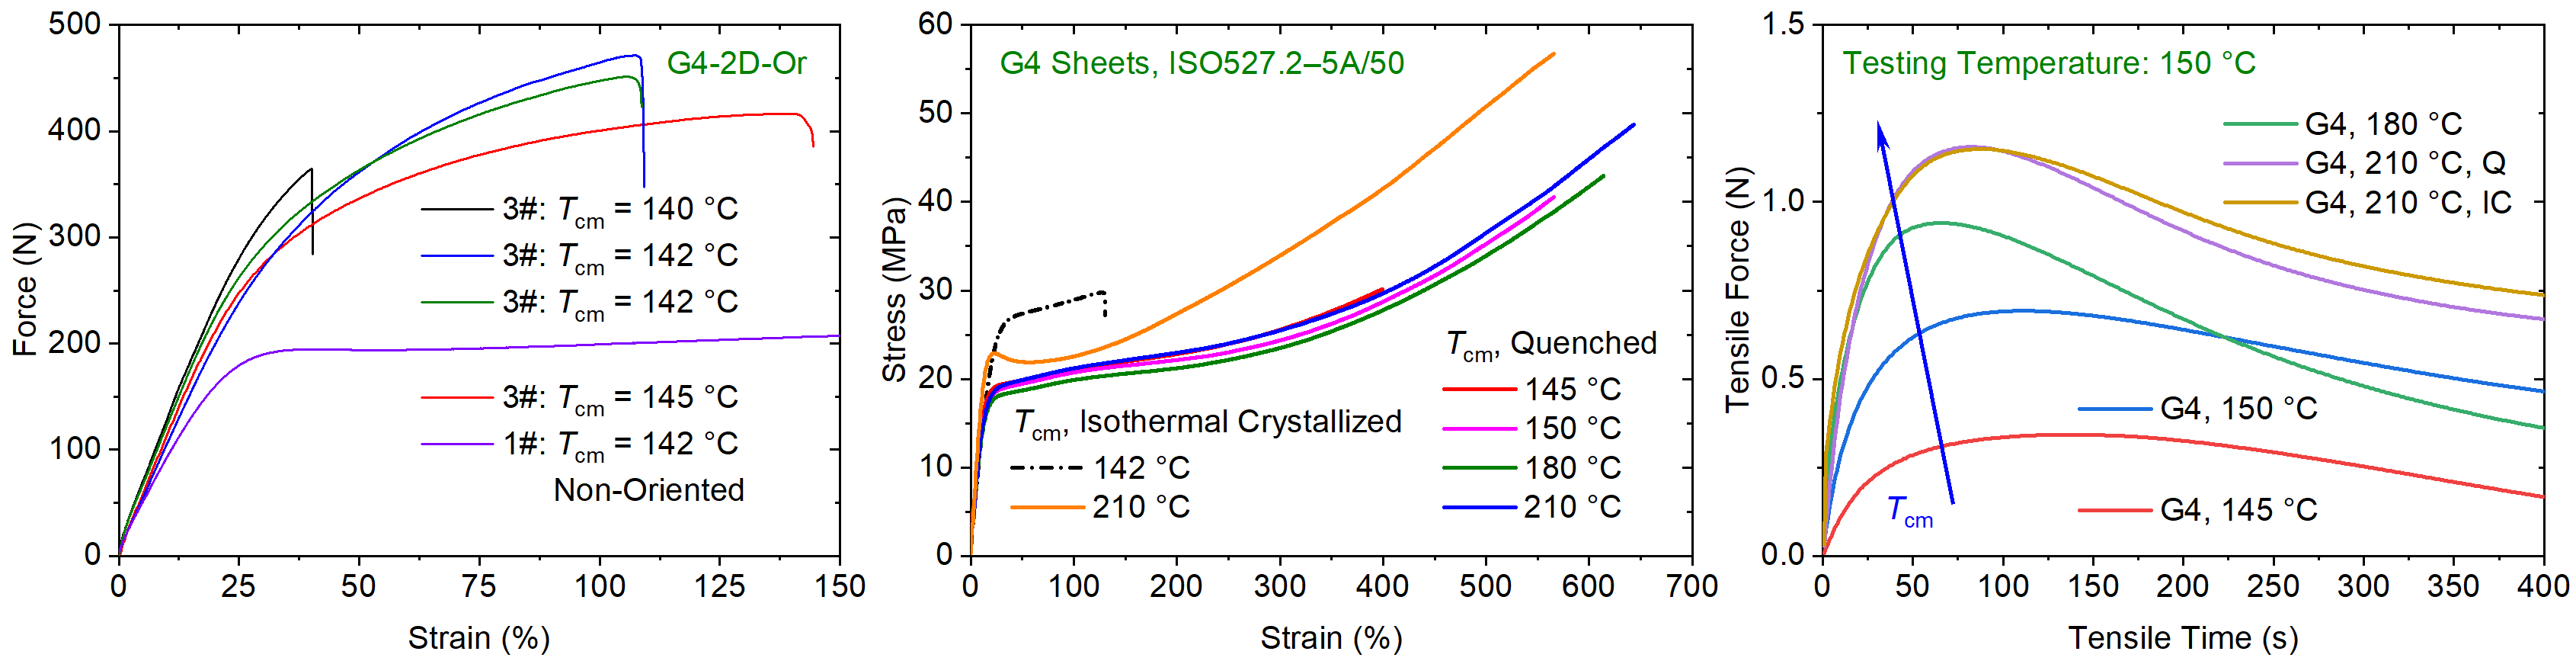


**Figure S1** Tensile stress–strain properties (left) of surface sheared G4 samples at distinct compression molding temperatures and solid-state tensile stress–strain properties (middle) and melt tensile stress–strain properties (right) of G4 sheets, compressed at distinct temperatures and subsequently quenched at 60 °C (Q) or isothermally crystallized at 128 °C (IC).


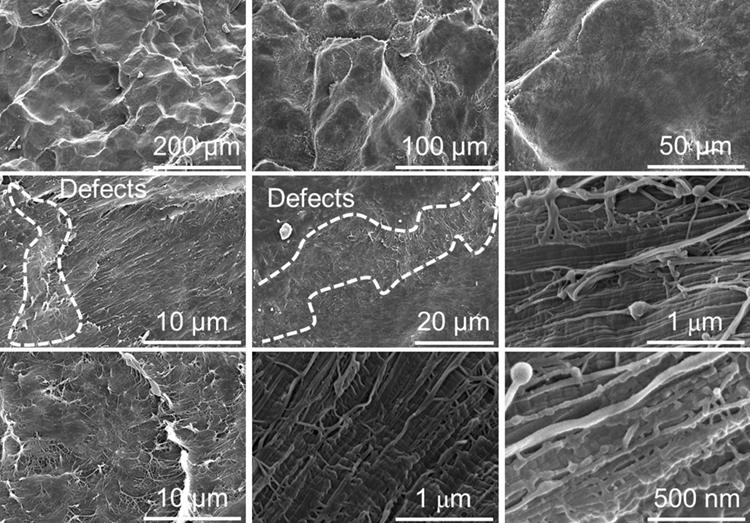


**Figure S2** Hierarchical morphology of macroscale 2D ordered nanofibrils in a sheet of nascent G4 powders, which was compression molded at 142 °C and isothermally crystallized at 128 °C for 5 h.


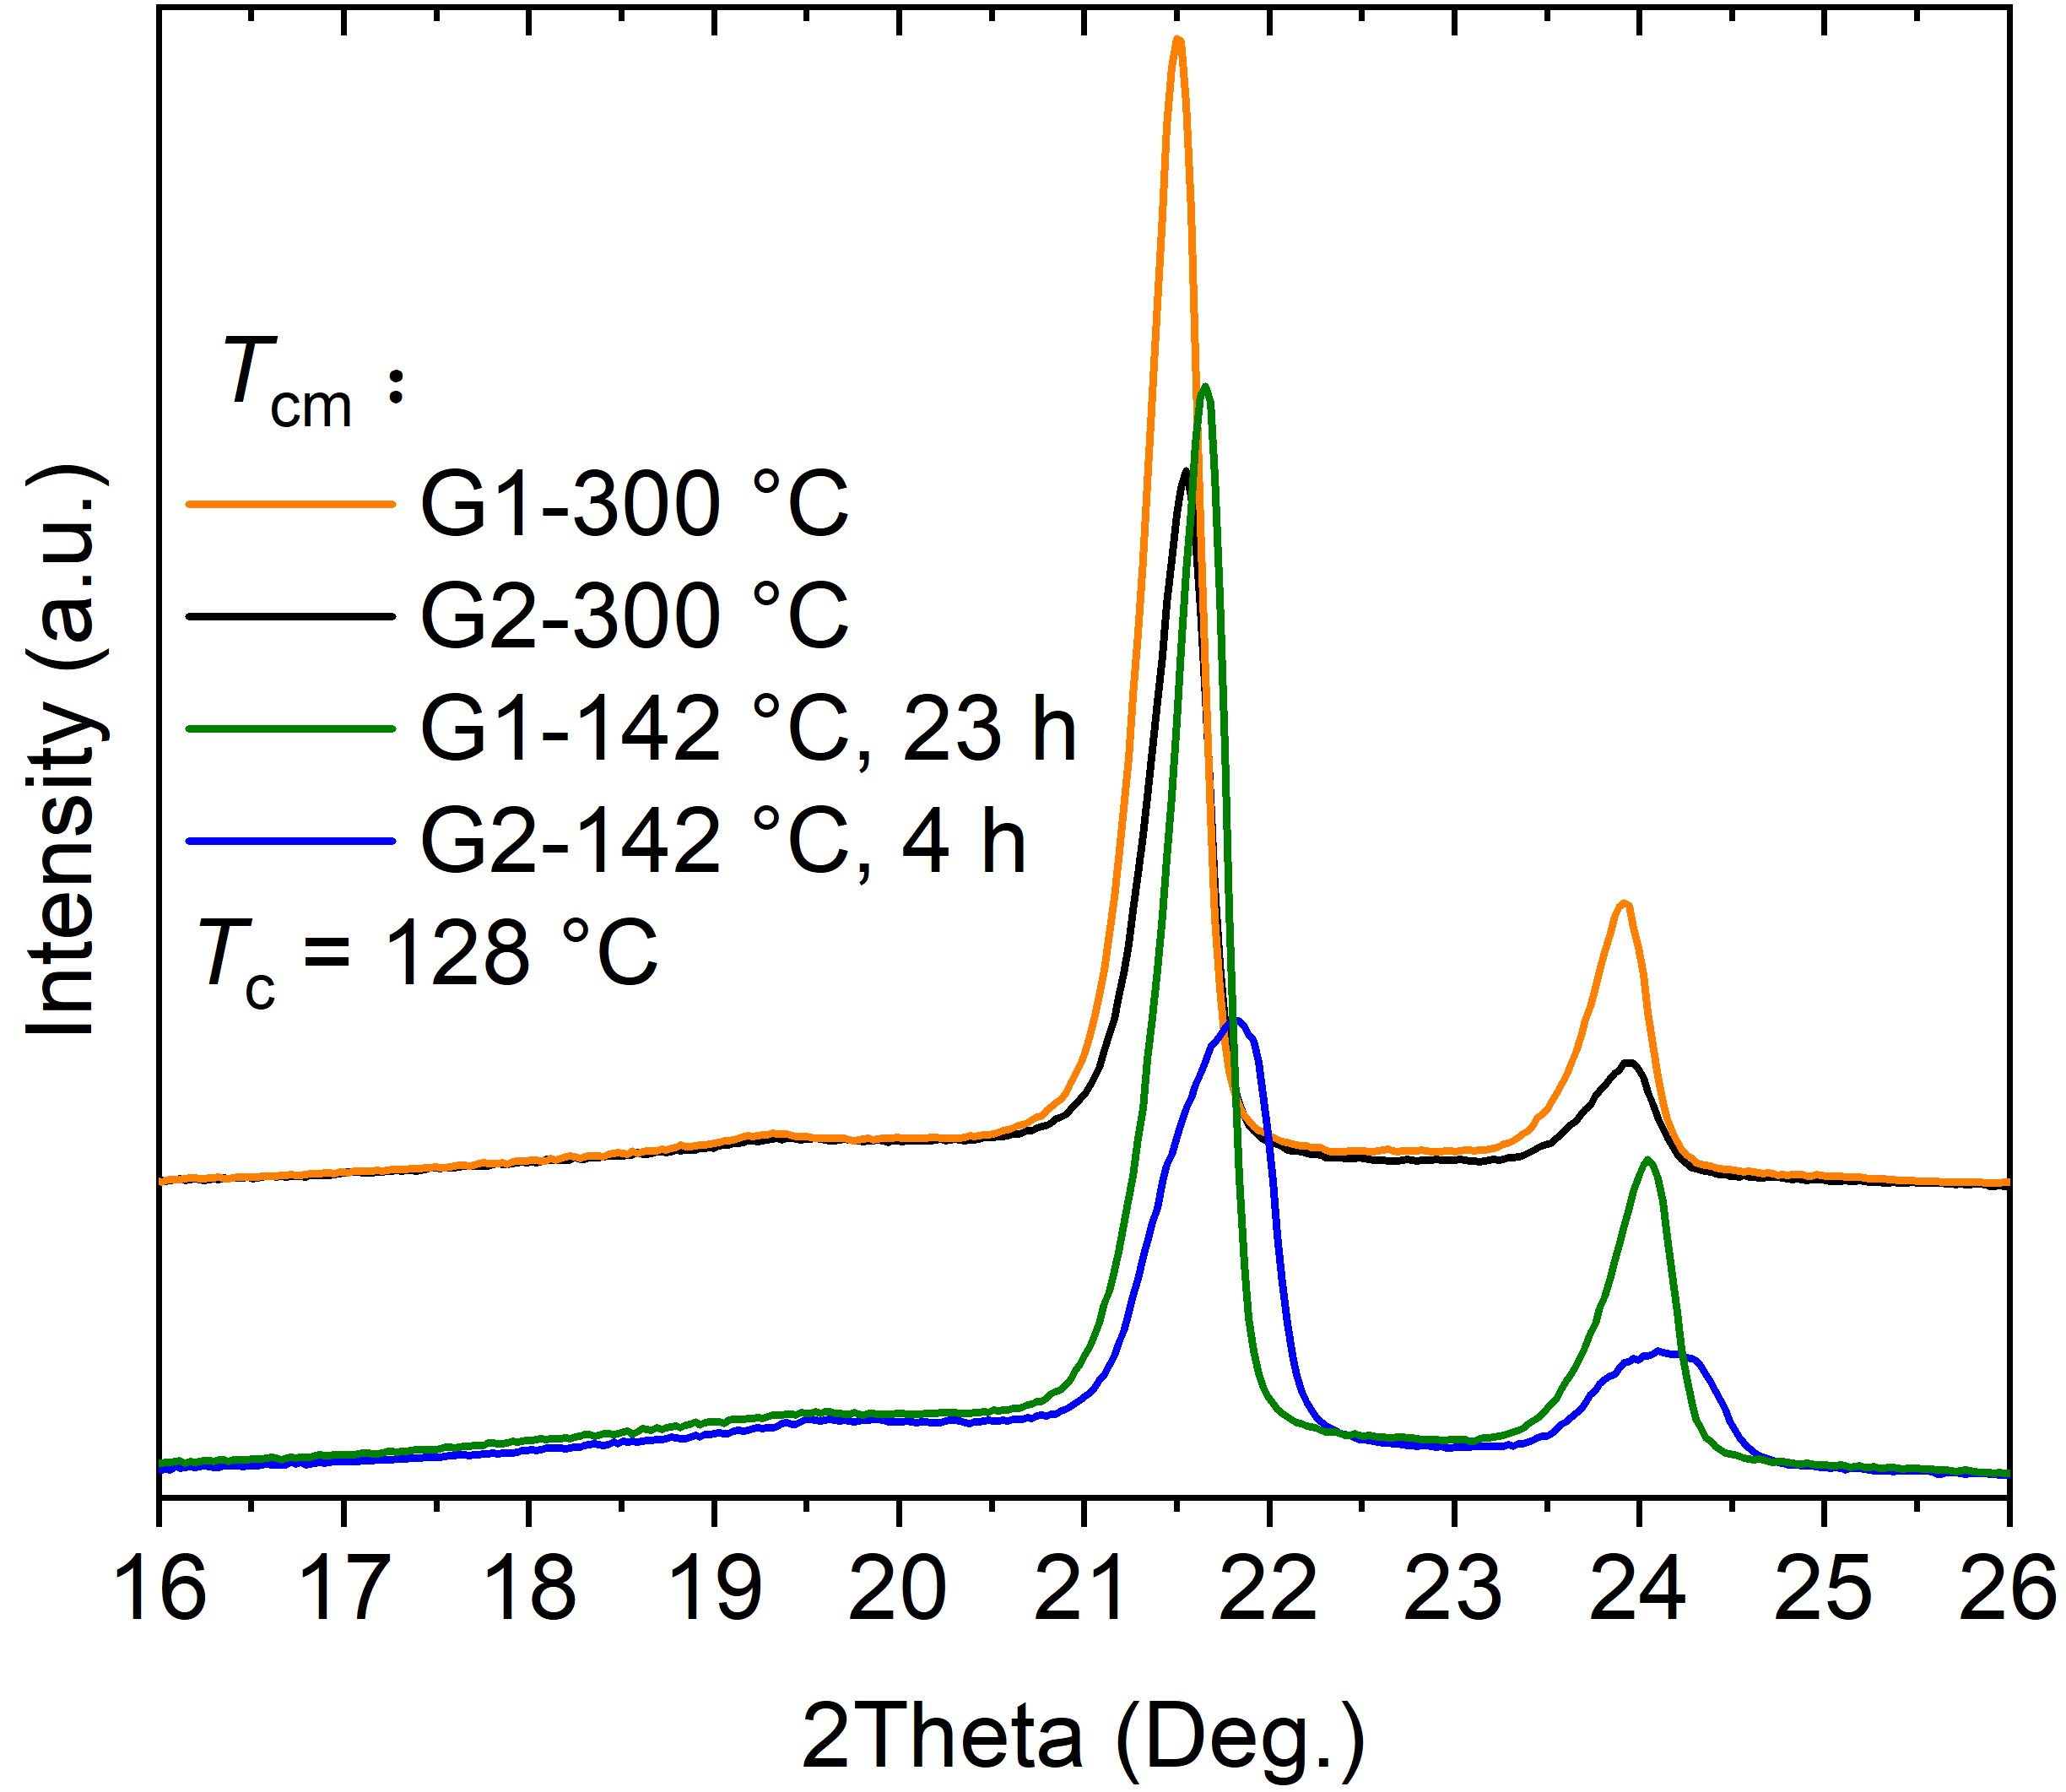

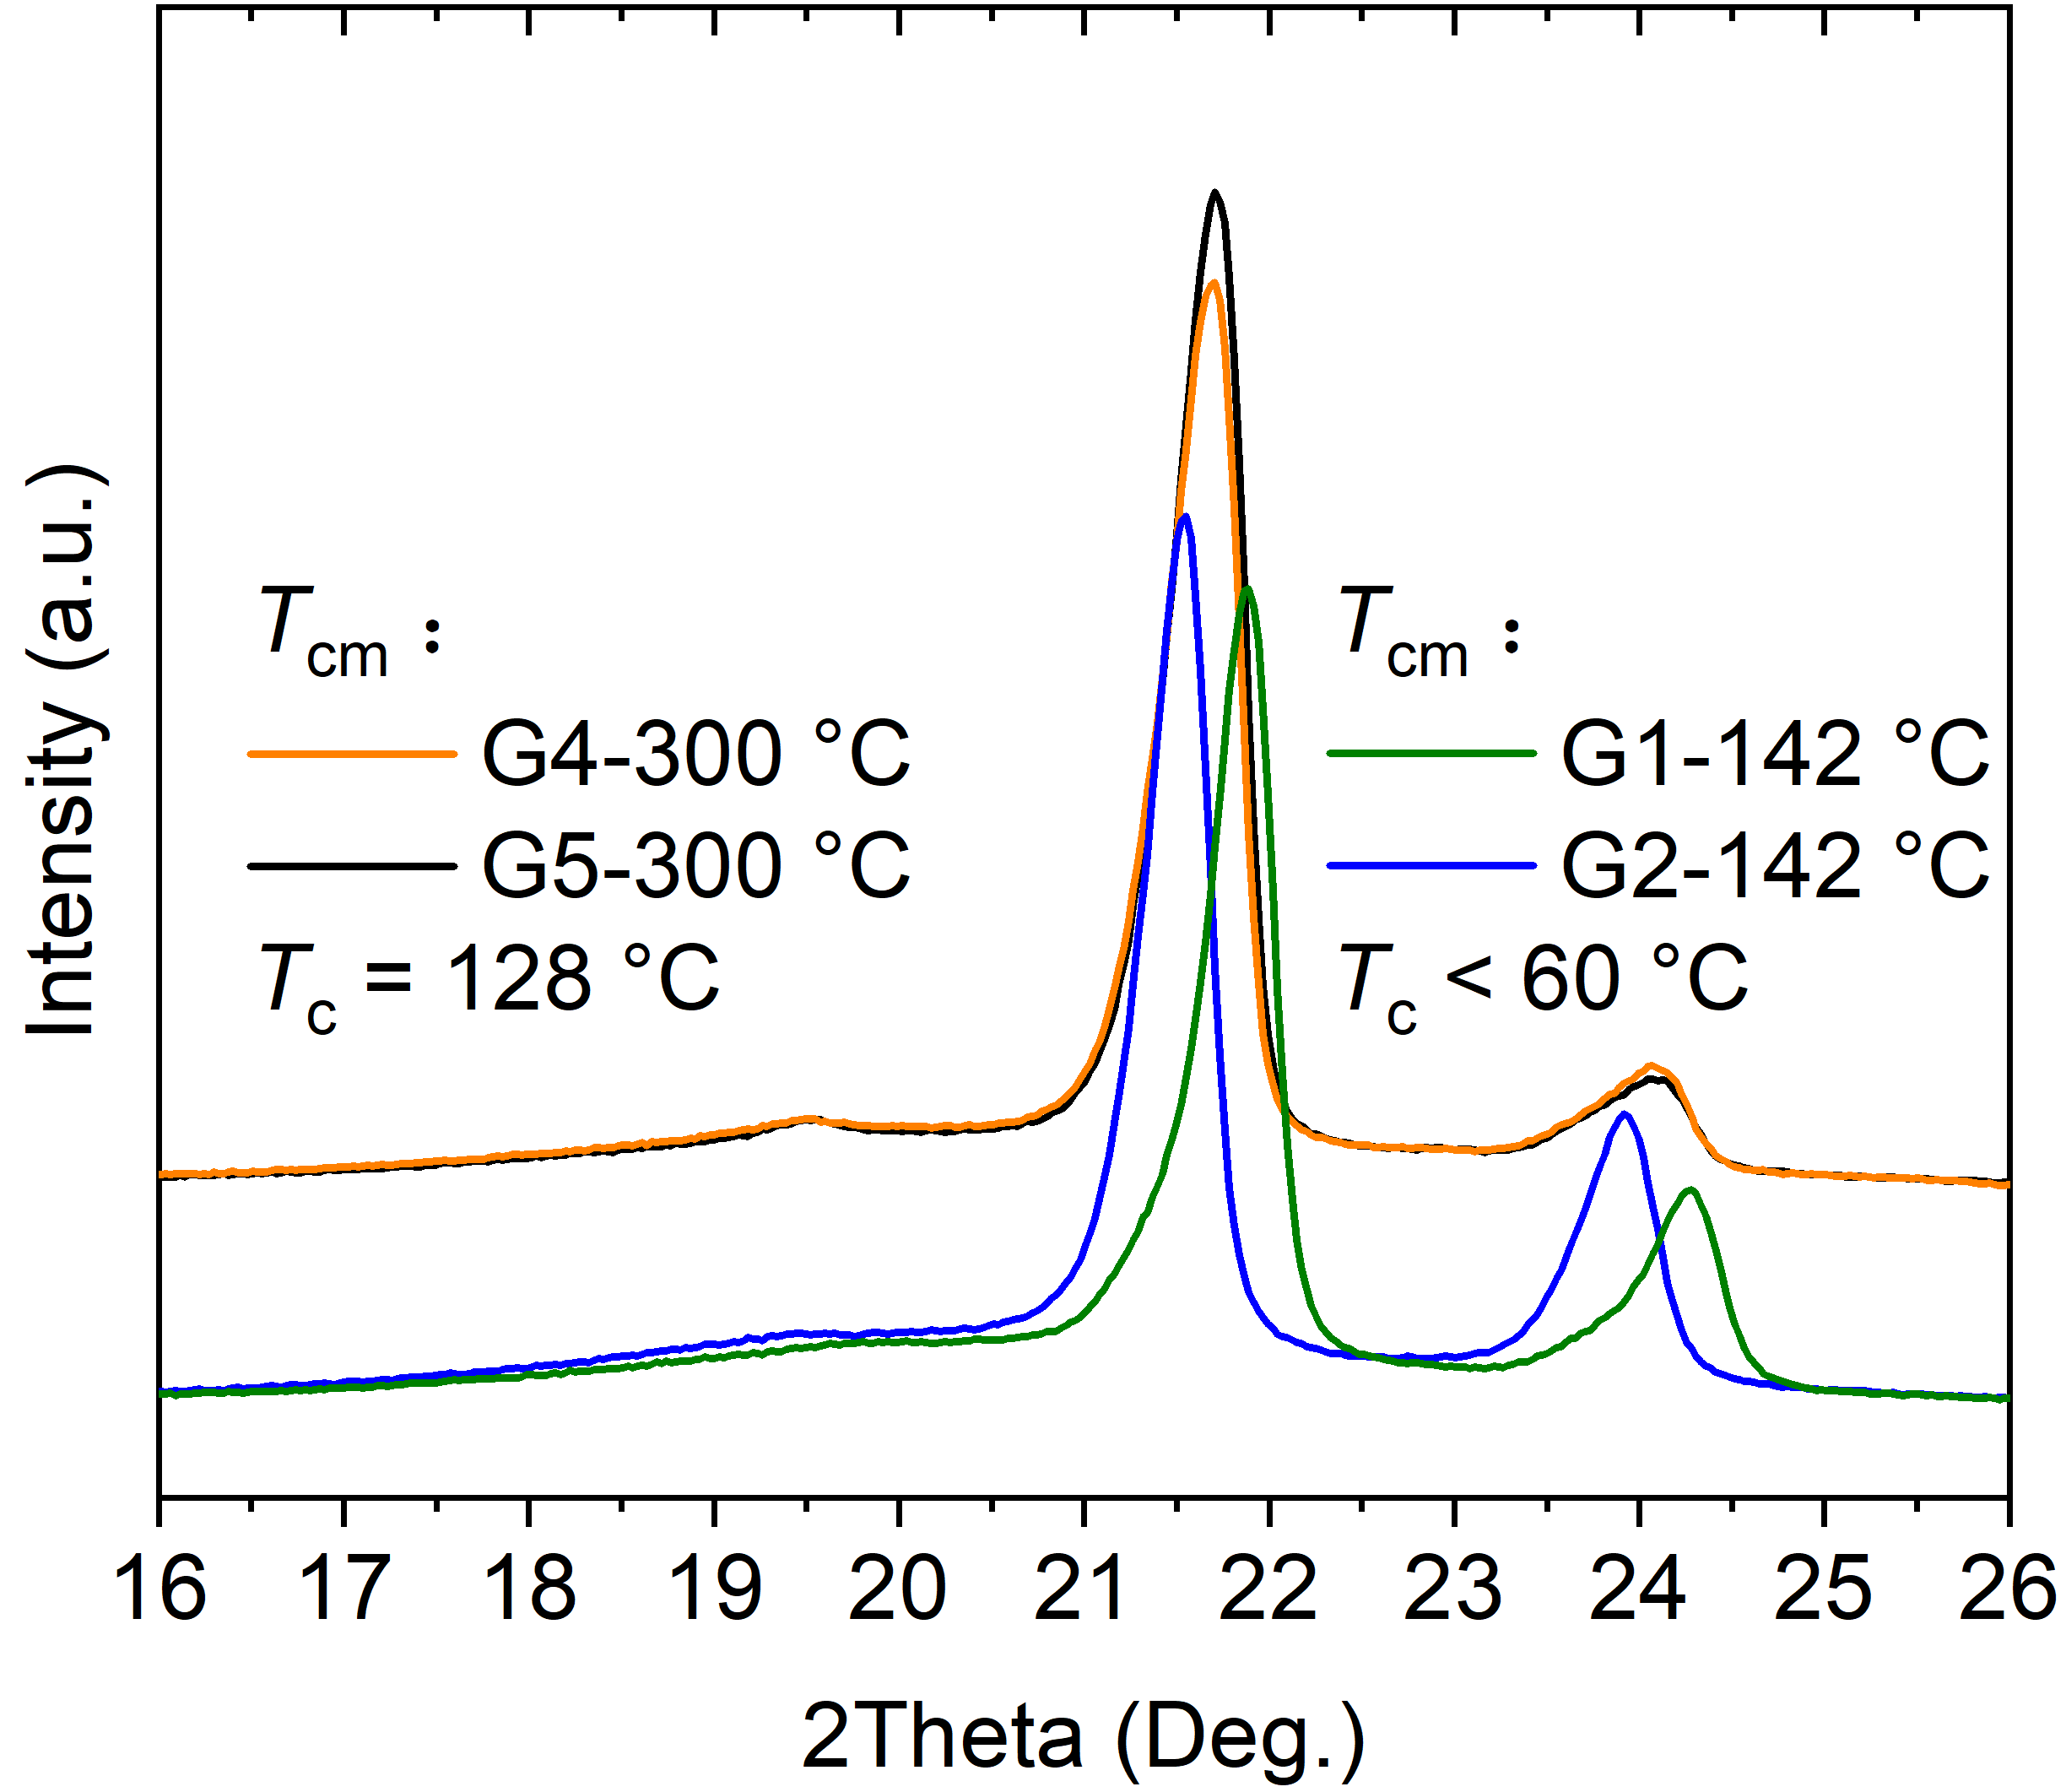


**Figure S3** XRD characterization of the crystal stems of G1–2/4 sheets.


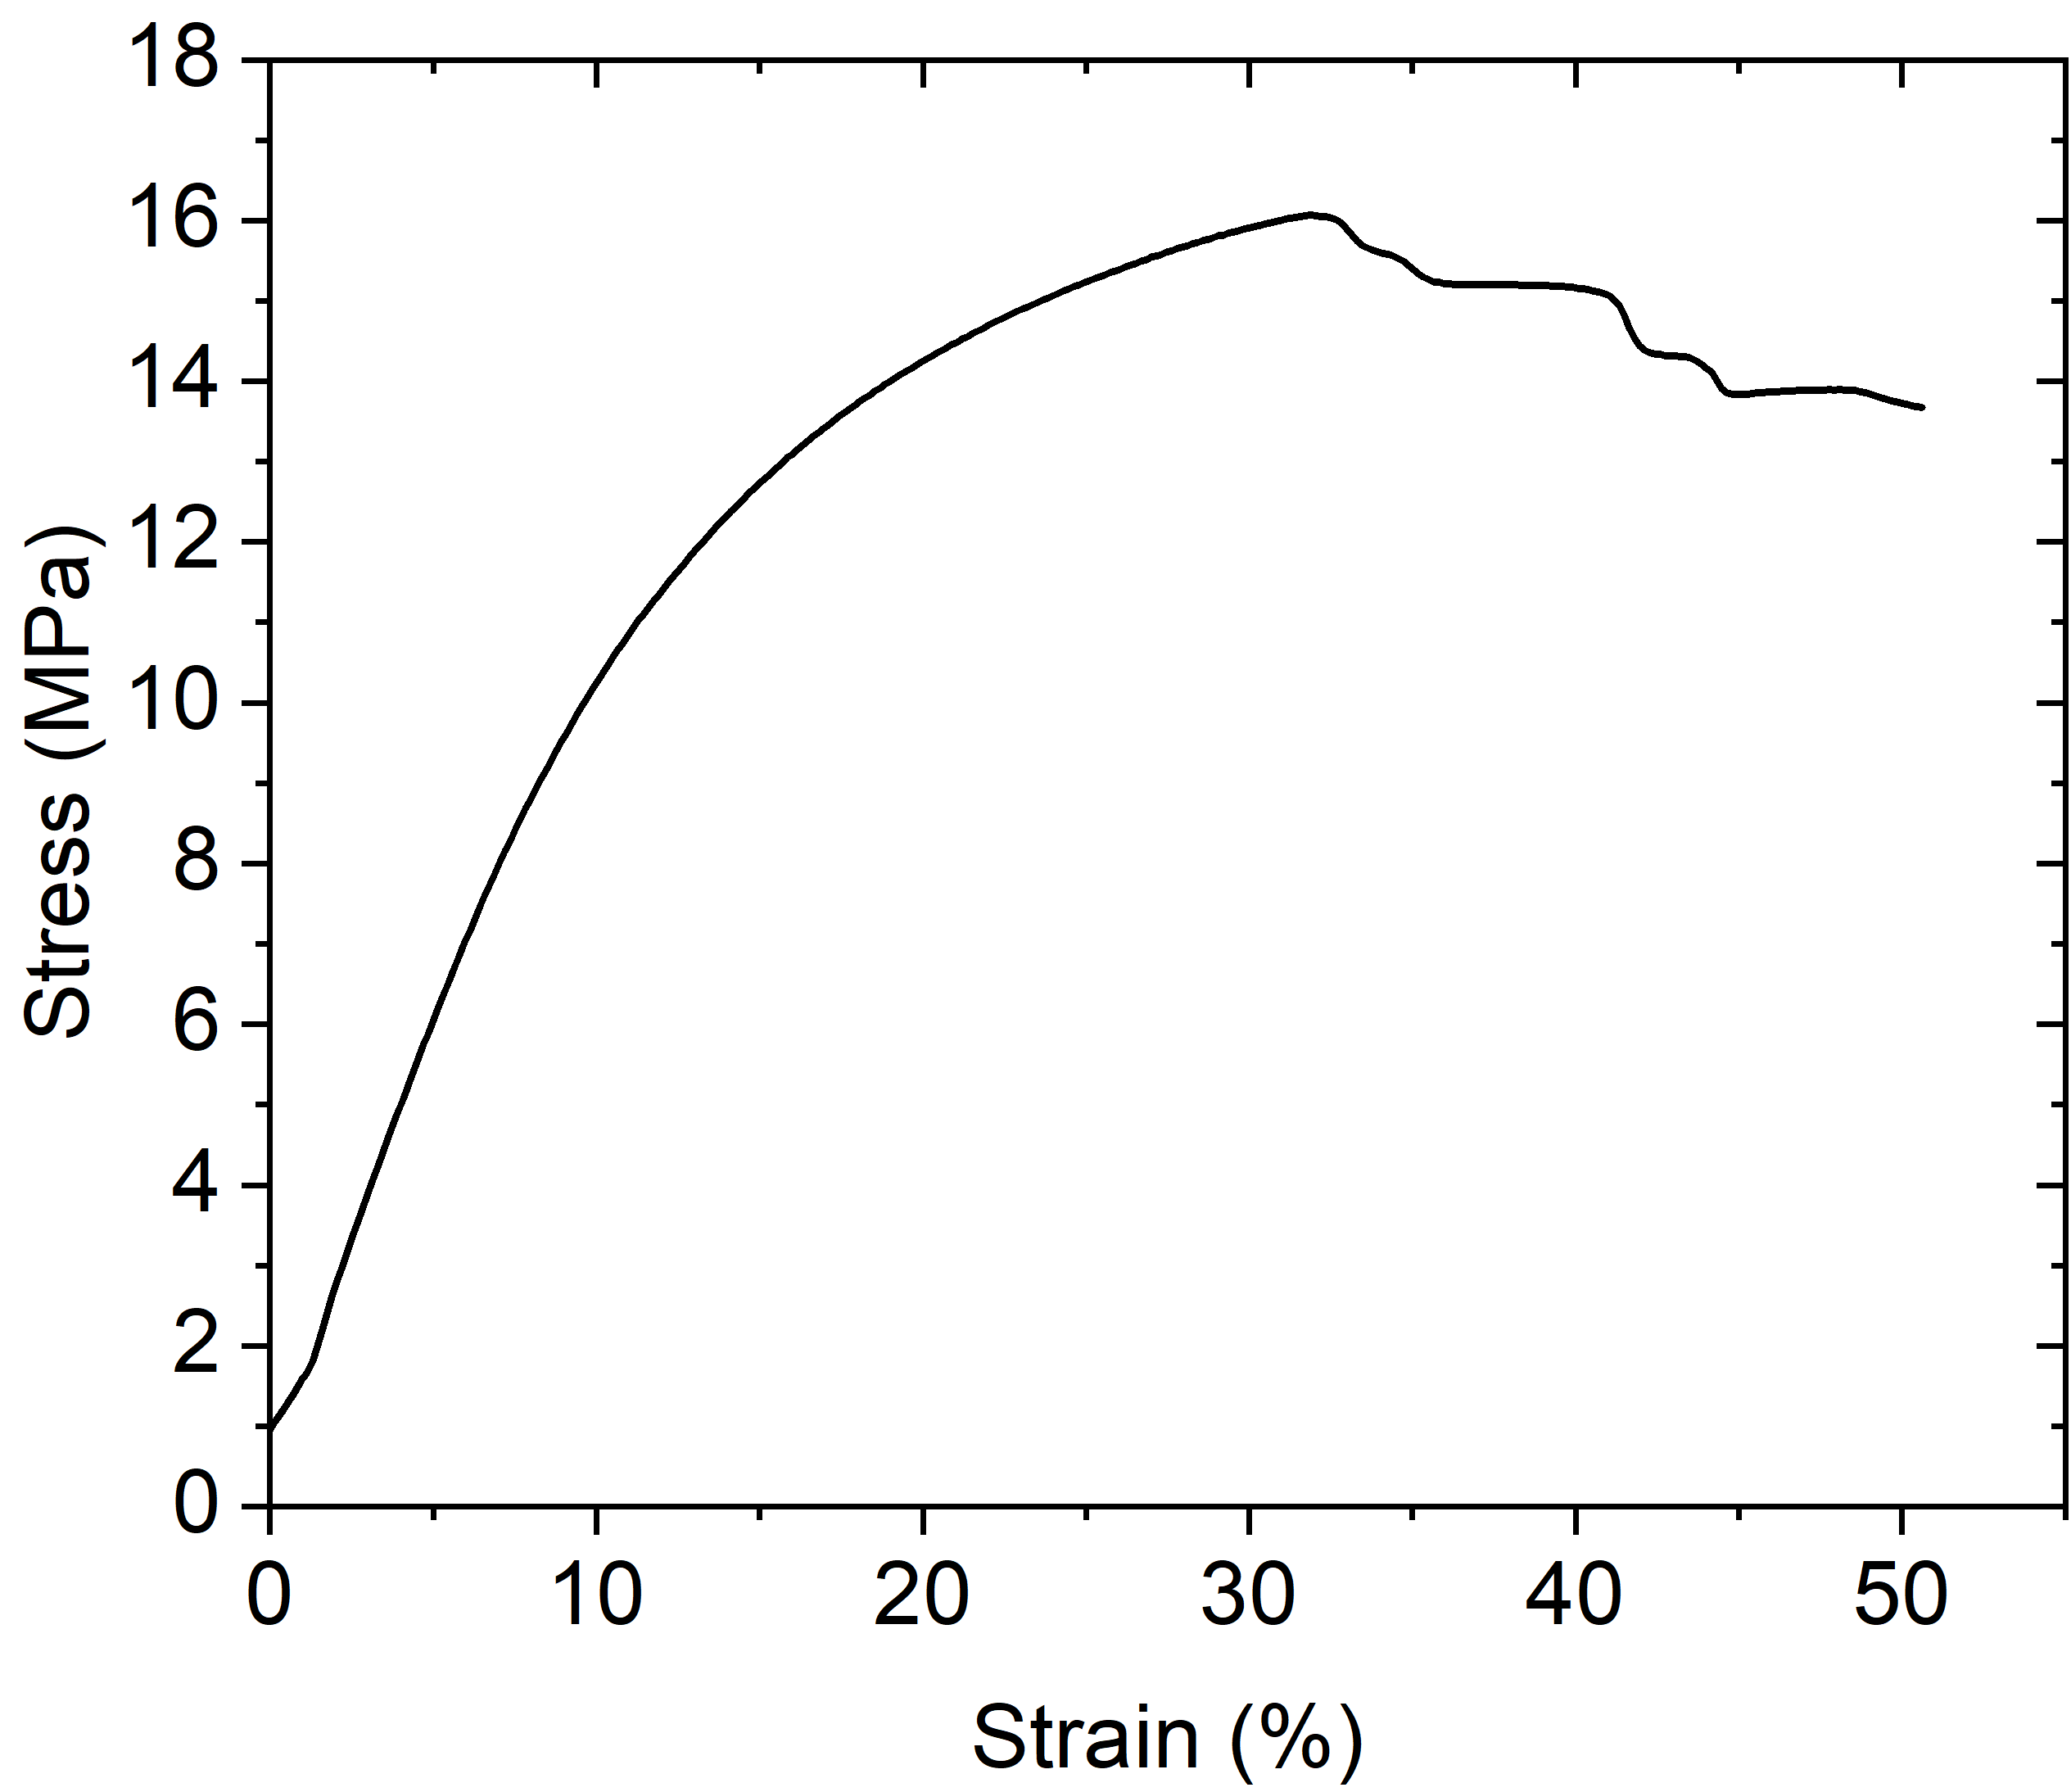


**Figure S4** Tensile stress–strain property of eplastomers, re-extruded and compressed at 115/110 °C after injection molding via the dynamic transformation of disordered meso/-microparticles into nanofibrillar networks.


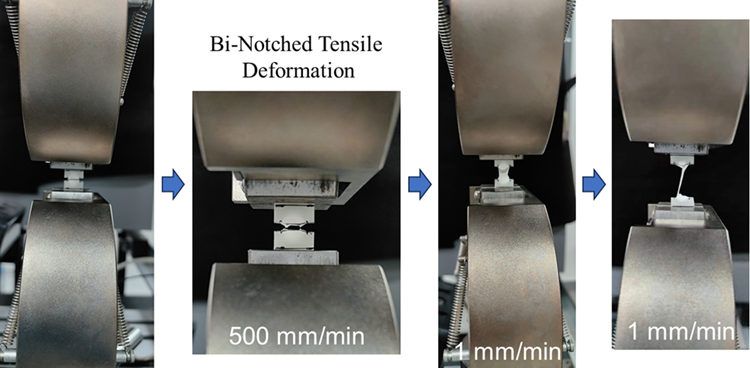


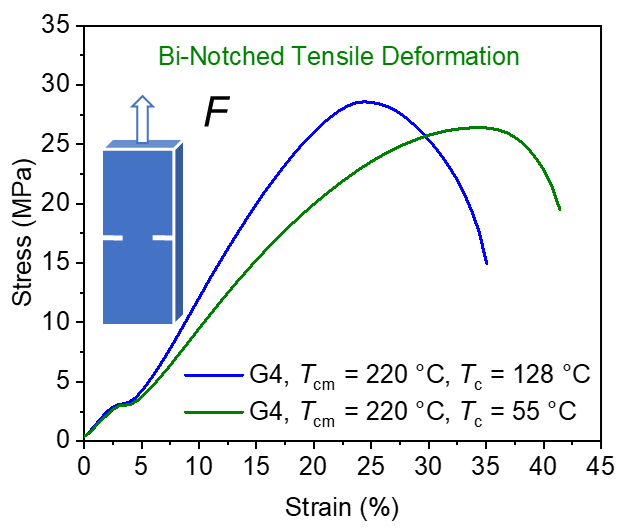


**Figure S5** Bi-notched tensile stress–strain properties of quenched and isothermal crystallized G4 sheets from an annealing temperature of 220 °C and subsequently quenched at 55 °C (Q) or isothermally crystallized at 128 °C (IC).
